# Supplementary material for: Design of polymer-free Vitamin-A acetate/cyclodextrin nanofibrous webs: antioxidant and fast-dissolving properties
Source: Royal Society of Chemistry journal article supplement (doi:10.1039/d0fo01776k), 2020-01-01
Supplement: d0fo01776k1.pdf [file d0fo01776k1.pdf]

## **SUPPORTING INFORMATION**

### **Design of Polymer-free Vitamin-A acetate/Cyclodextrin Nanofibrous Webs:**

#### **Antioxidant and Fast-dissolving Property**

Asli Celebioglu\* and Tamer Uyar\*

Department of Fiber Science & Apparel Design, College of Human Ecology, Cornell University, Ithaca,  
NY, 14853, United States

\*Corresponding Authors: AC: [ac2873@cornell.edu](mailto:ac2873@cornell.edu); TU: [tu46@cornell.edu](mailto:tu46@cornell.edu)

**Table S1.** The solution properties of viscosity and conductivity and the fiber diameters of resulting electrospun nanofibers.

| Nanofibers                           | Molar ratio<br>(Vitamin-A<br>acetate:CD) | Viscosity<br>(Pa·s) | Conductivity<br>( $\mu$ S/cm) | Average diameter<br>(nm) |
|--------------------------------------|------------------------------------------|---------------------|-------------------------------|--------------------------|
| HP $\beta$ CD                        | -                                        | 1.533               | 36.3                          | 220 $\pm$ 60             |
| Vitamin-A acetate/<br>HP $\beta$ CD  | 1:2                                      | 1.904               | 34.7                          | 195 $\pm$ 85             |
| HP $\gamma$ CD                       | -                                        | 2.567               | 5.8                           | 1260 $\pm$ 245           |
| Vitamin-A acetate/<br>HP $\gamma$ CD | 1:2                                      | 3.637               | 6.8                           | 610 $\pm$ 275            |

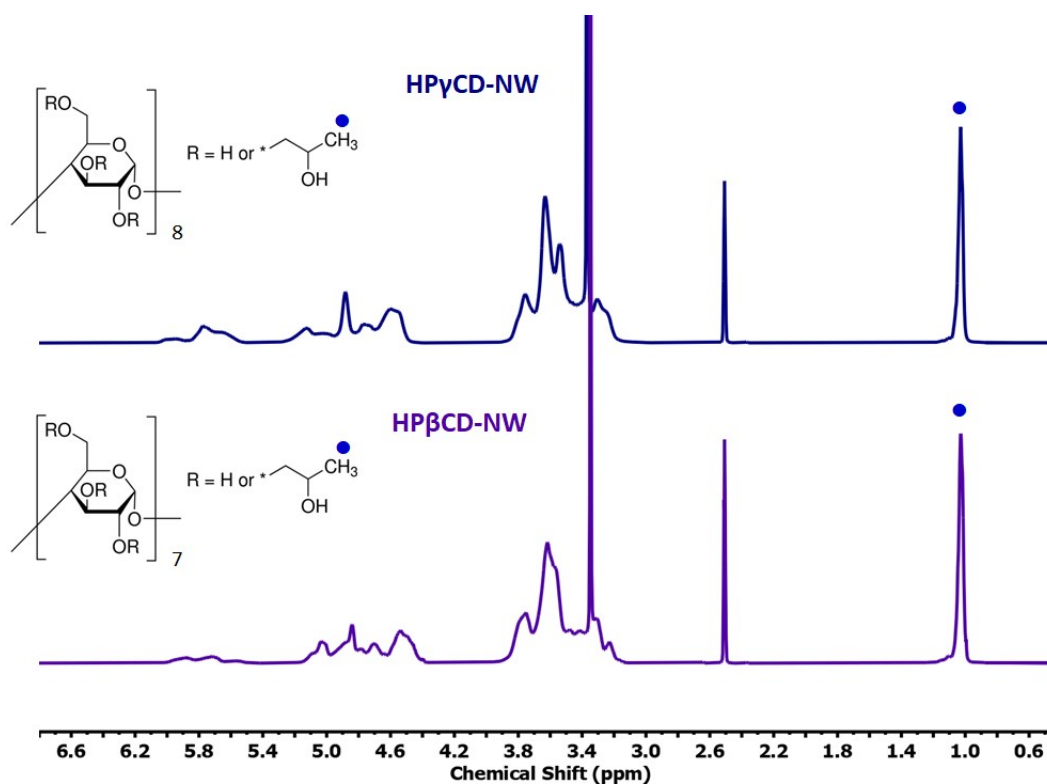

**Fig. S1** <sup>1</sup>H-NMR spectra of HPβCD-NW and HPγCD-NW which were recorded by dissolving samples in *d*<sub>6</sub>-DMSO.

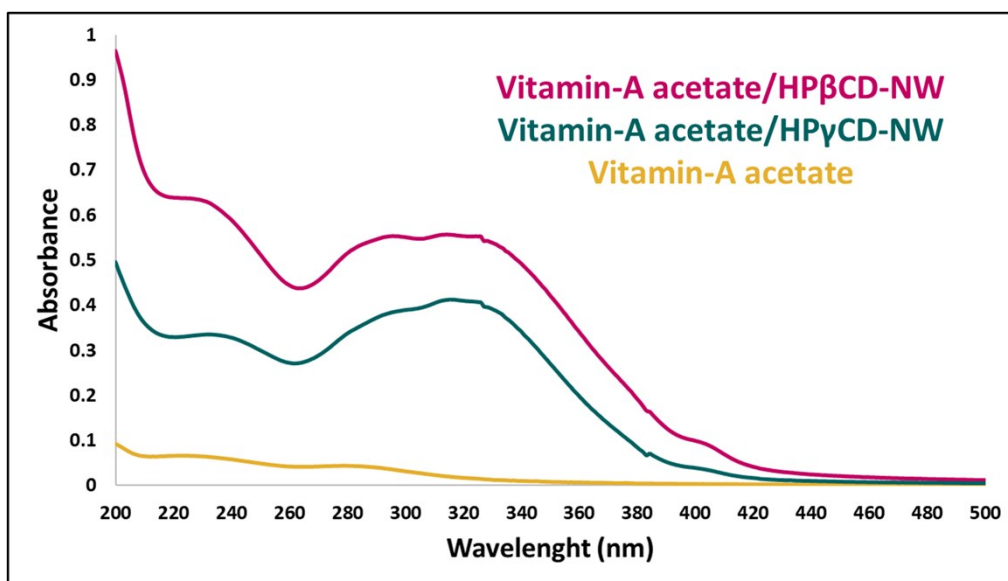

**Fig. S2.** UV-Vis spectroscopy graphs of the solutions of Vitamin-A acetate powder, Vitamin-A acetate/HPβCD-NW and Vitamin-A acetate/HPγCD-NW.

**Note:** For spectrophotometric measurements, ~ 1 mg of Vitamin-A acetate powder and ~ 10 mg of Vitamin-A acetate/CD-NW were stirred in 5 mL distilled water for 1 hour at RT and 150 rpm. Afterwards, all systems were filtered by PTFE filter (0.45 μm) to remove the un-dissolved Vitamin-A acetate parts and UV-Vis measurements were conducted in the range of 200–500 nm.

## Application of release data on mathematical models:

**Zero order model:** The release of drug can be represented by the equation:

$$C_0 - C_t = K_0 t$$

$$C_t = C_0 - K_0 t$$

$C_t$  is the amount of drug released at time  $t$ ,  $C_0$  is the initial concentration of drug at time  $t=0$ ,  $K_0$  is the zero-order rate constant. Here, the slope of the cumulative drug release vs. time plot gives the correlation coefficient ( $R^2$ ) value.

**First order model:** The release of drug can be represented by the equation:

$$dC/dt = -K_1 C$$

$K_1$  is the first order rate constant, expressed in  $\text{time}^{-1}$  or per hour

After rearranging and integrating the equation,

$$\log C = \log C_0 - K_1 t / 2.303$$

$C_0$  is the initial concentration of the drug,  $C$  is the percent of drug remaining at time  $t$ . Here, the slope of the  $\log$  % of drug remaining vs. time gives the  $R^2$  value.

**Higuchi model:** Higuchi release model is represented as:

$$M_t / M_\infty = K_h t^{1/2}$$

where  $M_t / M_\infty$  is the fraction of drug released at each time point ( $t$ ),  $M_t$  is the amount of drug released in time  $t$ ,  $M_\infty$  is the amount of drug released after time  $\infty$ , and  $K_h$  represents the Higuchi release kinetic constant. Here, the plot is obtained by cumulative percentage drug release vs. square root of time and the slope gives  $R^2$  value.

**Korsmeyer-peppas model:** Korsmeyer-peppas model is represented as:

$$M_t / M_\infty = K_{kp} t^n$$

$$\log (M_t / M_\infty) = \log K_{kp} + n \log t$$

$M_t / M_\infty$  is a fraction of drug released at time  $t$ ,  $M_t$  is the amount of drug released in time  $t$ ,  $M_\infty$  is the amount of drug released after time  $\infty$ ,  $n$  is the diffusional exponent or drug release exponent,  $K_{kp}$  is the Korsmeyer release rate constant. Here, the graph is plotted between  $\log$  cumulative % drug release vs.  $\log$  time and the slope gives  $R^2$  value.

**Table S2.** The correlation coefficient ( $R^2$ ) values of Vitamin-A acetate powder, Vitamin-A acetate/HP $\beta$ CD-NW and Vitamin-A acetate/HP $\gamma$ CD-NW calculated by using different kinetic models.

| <b>kinetic model</b>                 | <b>Vitamin-A acetate powder</b> | <b>Vitamin-A acetate/HP<math>\beta</math>CD-NW</b> | <b>Vitamin-A acetate/HP<math>\gamma</math>CD-NW</b> |
|--------------------------------------|---------------------------------|----------------------------------------------------|-----------------------------------------------------|
| Zero-order                           | 0.3349                          | 0.1779                                             | 0.2479                                              |
| First-order                          | 0.3350                          | 0.1514                                             | 0.2888                                              |
| Higuchi                              | 0.5699                          | 0.3836                                             | 0.4641                                              |
| Korsmeyer-Peppas                     | 0.6768                          | 0.7565                                             | 0.7722                                              |
| Diffusion exponent<br>( $n$ value) * | -0.3371                         | 0.6651                                             | 0.5980                                              |

\*calculated by the linear regression of Korsmeyer-Peppas equation of  $\log(M_t/M_\infty)$  versus  $\log t$ .
